# Supplementary material for: Tumor-targeted aggregation of pH-sensitive nanocarriers for enhanced retention and rapid intracellular drug release
Source: Royal Society of Chemistry journal article supplement (doi:10.1039/c4py00575a), 2014-05-30
Supplement: c4py00575a1.pdf [file c4py00575a1.pdf]

**Electronic Supplementary Information for:**

**Tumor-targeted aggregation of pH-sensitive nanocarriers for  
enhanced retention and rapid intracellular drug release**

Wei Wu, Qiujing Zhang, Jiantao Wang, Miao Chen, Shuai Li, Zaifu Lin and Jianshu Li\*

*College of Polymer Science and Engineering, Sichuan University, Chengdu, 610065, China*

*E-mail address: jianshu\_li@scu.edu.cn (J. Li)*

*Tel.: +86 28 85466755.*

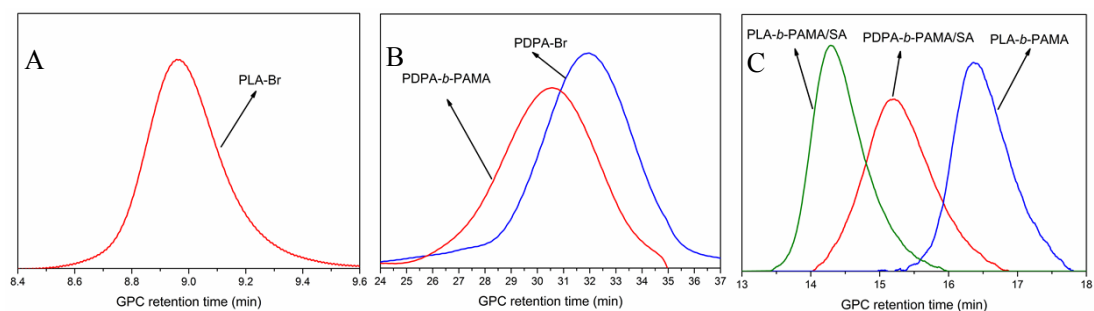

**Figure S1.** GPC traces of (A) PLA-Br in THF/40 °C; (B) PDPA-Br and PDPA-*b*-PAMA in pH 5.0 acetic buffer solution/25 °C; (C) PLA-*b*-PAMA, PLA-*b*-PAMA/SA and PDPA-*b*-PAMA/SA in DMF/70 °C.

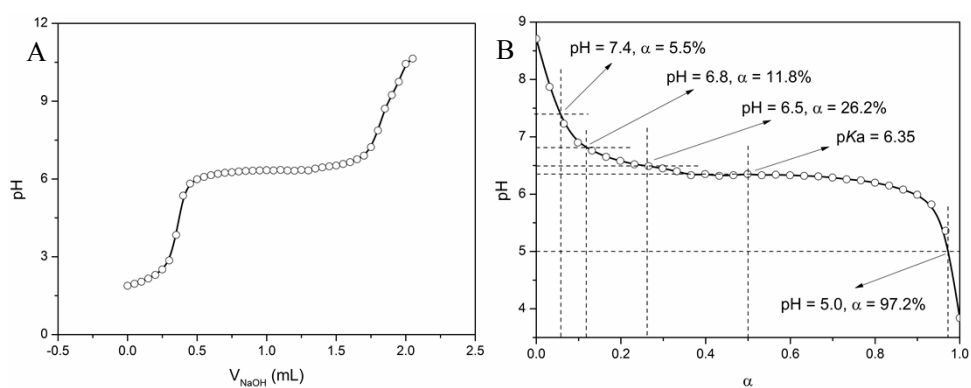

**Figure S2.** (A) Potentiometric acid-base titration and (B) same titration curve as shown in plots with the  $x$  axis expressed in terms of the mean protonated degree ( $\alpha$ ) of PDPA-Br. The arrows indicates the pKa value of PDPA and its  $\alpha$  value at typical pH values.
